# Supplementary material
Source: PubMed Central journal article supplement (PMC4088963)
Supplement: NIHMS592677-supplement-Supp_Data.pdf [file NIHMS592677-supplement-Supp_Data.pdf]

## Supplementary Materials

Functional RNAs exhibit tolerance for non-heritable 2'-5' vs. 3'-5' backbone heterogeneity\*

Aaron E. Engelhart, Matthew W. Powner, and Jack W. Szostak

\*correspondence to: [szostak@molbio.mgh.harvard.edu](mailto:szostak@molbio.mgh.harvard.edu)

**Supplementary Figure S1.** Simulated binominal distributions of 2'-5' linkages in a) a 43-linkage half-functional RNA and b) a 5-linkage core of critical residues.

**Supplementary Figure S2.** <sup>1</sup>H-NMR spectrum (400MHz, D<sub>2</sub>O) of H1' region of dinucleotides prepared from pure 2'-ODBTMS protected phosphoramidite, pure 3'-OTMBDS phosphoramidite, and a 1:1 mixture of the two phosphoramidites.

**Supplementary Figure S3.** Fluorescence titrations of 1 μM FMN with FMN aptamers.

**Supplementary Table S1.** HR-MS of synthesized RNAs.

a)

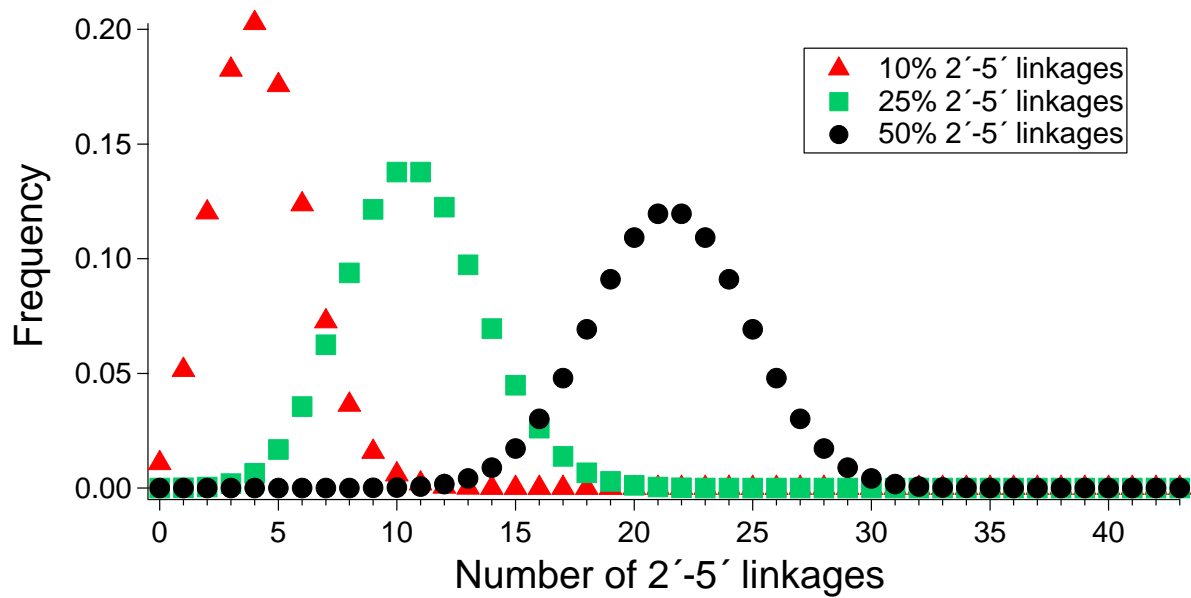

b)

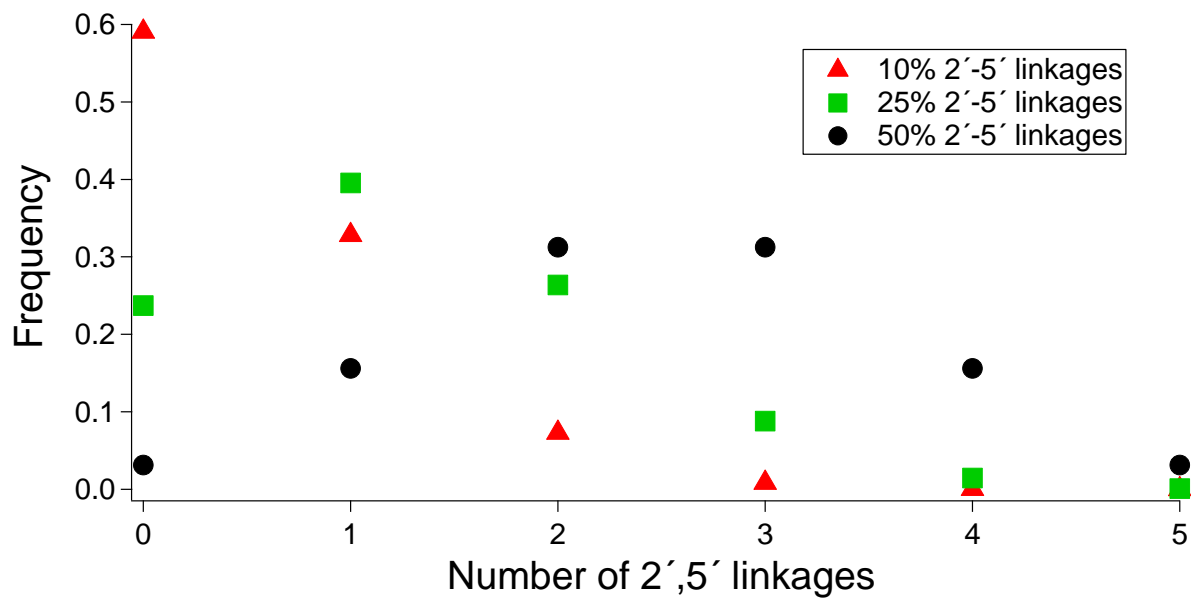

**Supplementary Figure S1.** Simulated binomial distributions of 2'-5' linkages in a) a 43-linkage functional RNA (i.e., the sum of the number of linkages found in **HH1** and **HH2**) and b) a 5-linkage core of critical residues (representative of a typical non-stem region, as found in, e.g., **FMN2**).

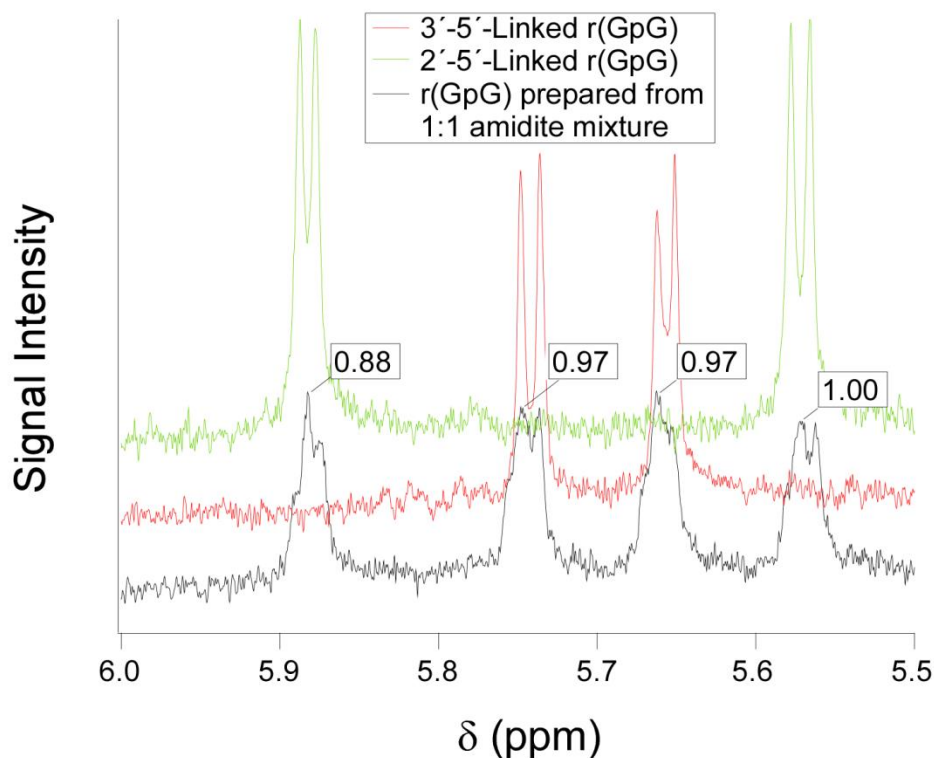

**Supplementary Figure S2.** <sup>1</sup>H-NMR spectrum (400MHz, D<sub>2</sub>O) of H1' region of dinucleotides prepared from pure 2'-ODBTMS protected phosphoramidite, pure 3'-OTMBDS phosphoramidite, and a 1:1 mixture of the two phosphoramidites. Normalized, integrated peak intensities for the dinucleotide mixture prepared from mixed amidites are given as annotations.

a)

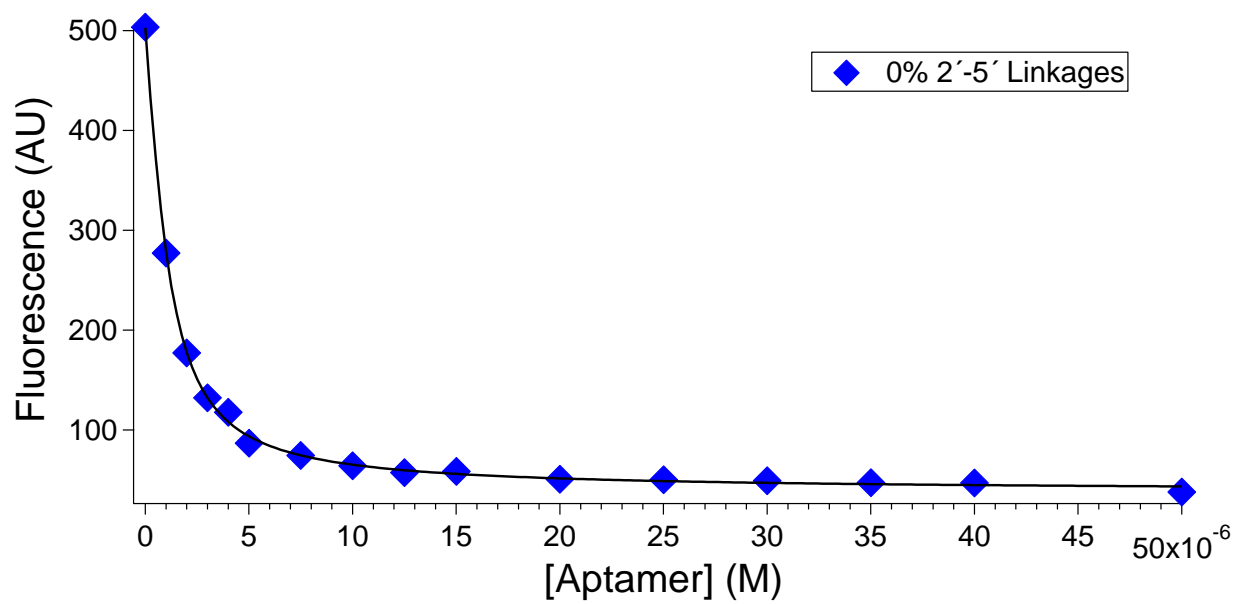

b)

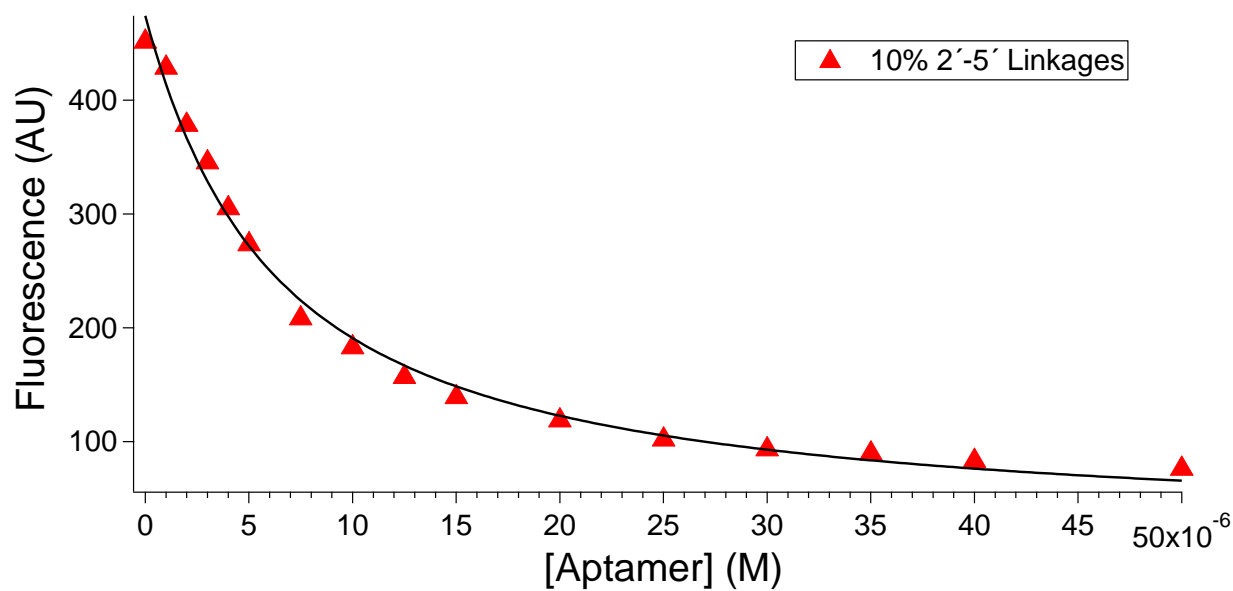

c)

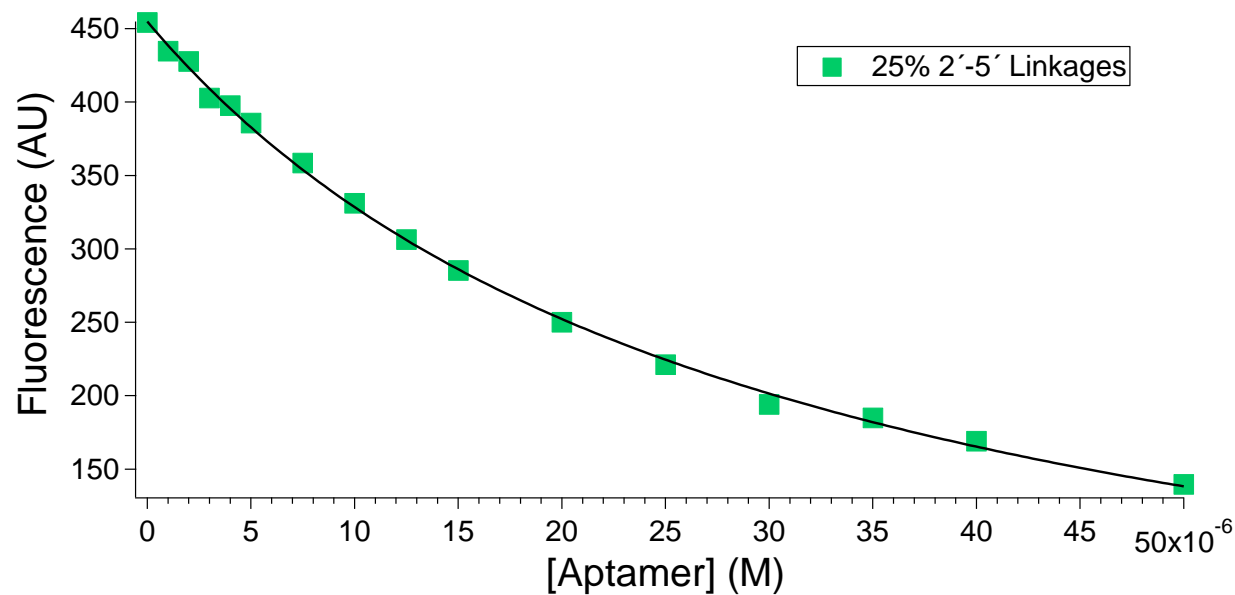

d)

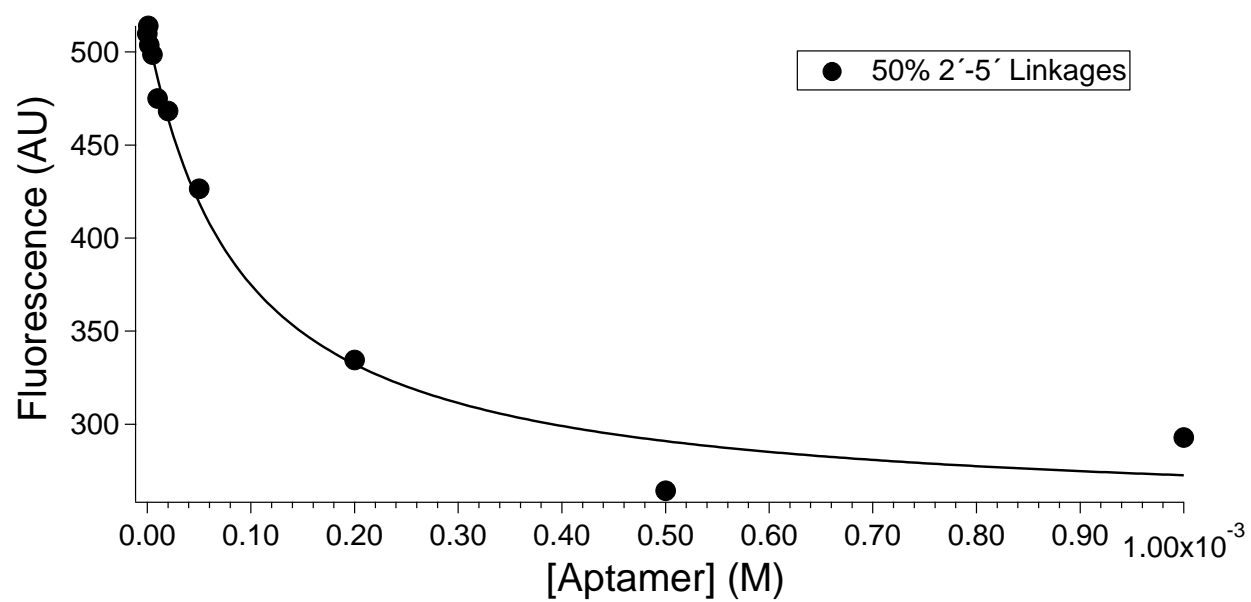

**Supplementary Figure S3.** Fluorescence titrations of 1  $\mu$ M FMN with FMN aptamers with a) 0%, b) 10%, c) 25%, and d) 50% 2'-5' linkages. Curves represent fit to data.

| <b>Strand</b>   | <b>Level of random 2'-5' substitution</b> | <b>Expected Mass</b> | <b>Actual Mass</b> |
|-----------------|-------------------------------------------|----------------------|--------------------|
| <b>FMN-1</b>    | 0%                                        | 6482.906             | 6482.8861          |
| <b>FMN-1</b>    | 10%                                       | 6482.906             | 6482.9050          |
| <b>FMN-1</b>    | 25%                                       | 6482.906             | 6482.9087          |
| <b>FMN-1</b>    | 50%                                       | 6482.906             | 6482.9081          |
| <b>FMN-2</b>    | 0%                                        | 6095.884             | 6095.8724          |
| <b>FMN-2</b>    | 10%                                       | 6095.884             | 6095.8903          |
| <b>FMN-2</b>    | 25%                                       | 6095.884             | 6095.8894          |
| <b>FMN-2</b>    | 50%                                       | 6095.884             | 6095.8930          |
| <b>HH-1</b>     | 0%                                        | 8504.2571            | 8504.1738          |
| <b>HH-1-C19</b> | n/a                                       | 8534.2571            | 8534.1095          |
| <b>HH-1</b>     | 10%                                       | 8534.2571            | 8534.1656          |
| <b>HH-1</b>     | 25%                                       | 8534.2571            | 8534.1615          |
| <b>HH-1</b>     | 50%                                       | 8534.2571            | 8534.1815          |
| <b>HH-2</b>     | 0%                                        | 6473.9111            | 6473.8903          |
| <b>HH-2-G13</b> | n/a                                       | 6473.9111            | 6473.8738          |
| <b>HH-2</b>     | 10%                                       | 6473.9111            | 6473.8947          |
| <b>HH-2</b>     | 25%                                       | 6473.9111            | 6473.8919          |
| <b>HH-2</b>     | 50%                                       | 6473.9111            | 6473.9566          |

**Supplementary Table S1.** HR-MS of synthesized RNAs. LC-MS was performed on an Agilent 1200 coupled to an Agilent 6520 Accurate-Mass Q-TOF LC/MS. Masses shown are the deconvoluted monoisotopic masses.
